# Supplementary material for: An essential role for decorin in bladder cancer invasiveness
Source: PubMed Central journal article supplement (PMC3914526; doi:10.1002/emmm.201302655), 2013-10-20
Supplement: emmm0005-1835-sd2.pdf [file emmm0005-1835-sd2.pdf]

## **Supplementary materials for**

### **An essential role for decorin in bladder cancer invasiveness**

M. El Behi, S. Krumeich, C. Lodillinsky, A. Kamoun, L. Tibaldi, G. Sugano, A. De Reynies, E. Chapeaublanc, Y. Allory, F. Radvanyi, O. Lantz, A. M. Eiján, I. Bernard-Pierrot\*, C. Théry\*

#### **Table of content**

**Supplementary figure 1:** Analysis of immune cells infiltrating bladder five days after tumor injection

**Supplementary figure 2:** necrotic MB49-I cells do not activate HY-specific T cells

**Supplementary figure 3:** MB49 grows faster than MB49-I *in vitro*

**Supplementary figure 4:** Decorin knockdown in MB49-I cells does not affect the nature of immune cells infiltrating the tumor

**Supplementary figure 5:** Two additional independent analyses confirm that decorin is overexpressed in human MIBC as compared to NMIBC.

**Supplementary figure 6:** *DCN* mRNA level is not correlated to *DCN* DNA level in bladder tumors.

**Supplementary figure 7:** Gene ontology annotation enriched within genes correlated to *DCN*.

**Supplementary figure 8:** Decorin is not required for *in vitro* proliferation of TCCSUP, and promotes matrigel invasion by MB49 and MB49-I cells *in vitro*.

**Supplementary figure 9:** a specific *DCN* isoform is expressed by muscle cells in bladder.

**Supplementary Table 1:** Genes with mRNA expression level correlated or anticorrelated to *DCN* expression level in human MIBC.

**Supplementary Table 2:** Functional pathways and gene ontology annotations relative to biological processes significantly enriched in genes positively correlated with *DCN* in human MIBC.

**Supplementary Table 3:** Affymetrix U133plus2.0 microarray data in 162 human bladder tumors and 4 normal samples, for genes correlated with *DCN* in MIBC (pearson  $R > 0.5$ ).

**Supplementary figure 1: Analysis of immune cells infiltrating bladder five days after tumor injection**

Nature of immune lymphoid cells infiltrating MB49 and MB49-I 5 days after orthotopic injection of the tumors, analyzed by multicolour flow cytometry as described in figure 2. Percent of each cell type in individual mice is indicated (pool of 2 independent experiments). No difference is observed in the immune infiltrates of the two tumors at this time point.



## **Supplementary figure 2: necrotic MB49-I cells do not activate HY-specific T cells**

A: After repeated cycles of freezing and thawing, MB49 and MB49-I cells emulsified in CFA were injected in the footpads of CD45.1 female B6 mice. Mice were injected 24h later with  $4 \cdot 10^6$  CellTrace Violet-labeled CD45.2 splenocytes from Marilyn and MataHari mice. Six days after the initial injection of protein extracts, mice were sacrificed and CellTrace Violet dilution was analyzed in  $CD45.2^+ V\beta 6^+ CD4^+$  (Marilyn) or  $V\beta 8^+ CD8^+$  (MataHari) T cells from popliteal lymph nodes. B: Quantification of the % of dividing Marilyn and MataHari cells from one experiment with two mice in each group.

# Supplementary Figure 2

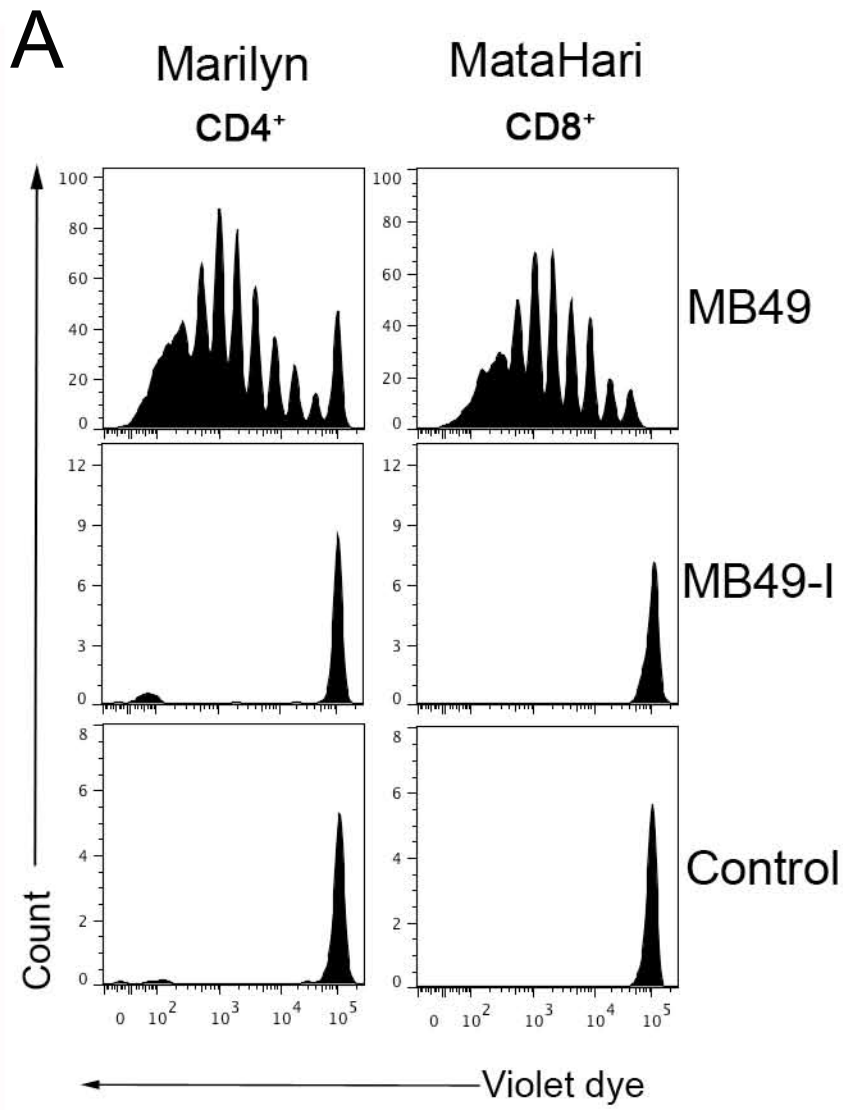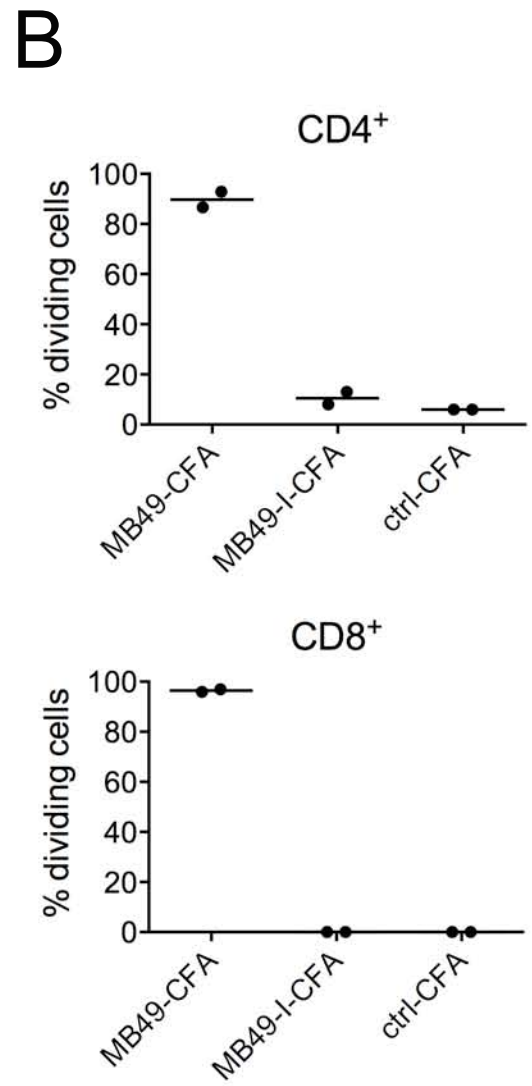

**Supplementary figure 3: MB49 grows faster than MB49-I *in vitro***

*In vitro* growth of MB49 and MB49-I cells quantified during 48h using Cell Titer blue viability assay (pool of 2 independent experiments). \*\*:  $p=0.0042$  at 24h,  $p=0.0076$  at 48h (Mann-Whitney test).

### Supplementary Figure 3

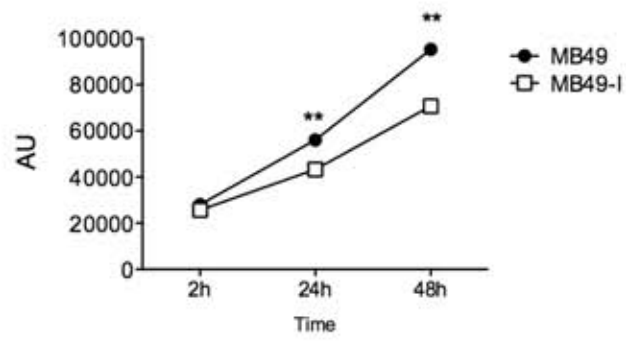

**Supplementary figure 4: Decorin knockdown in MB49-I cells does not affect the nature of immune cells infiltrating the tumor**

Nature of immune lymphoid cells infiltrating MB49-I-shDcn1, MB49-I-shDcn2 and MB49-I-Scr after orthotopic injection of the tumors, analysed by multicolour flow cytometry as in Figure 2 and Supplementary Figure 1. Seven days after injection, hematopoietic cells infiltrating the bladder were defined by their expression of the pan-hematopoietic marker CD45. Percent of each hematopoietic cell type in individual mice is indicated. Data from one experiment with six mice per group is shown. Horizontal bar = median. n.s. = non significant as compared to Scr (total cells:  $p > 0.9999$  for shDcn1 and shDcn2; B cells:  $p > 0.9999$  for shDcn1,  $p = 0.4469$  for shDcn2; NK cells:  $p = 0.25$  for shDcn1,  $p > 0.9999$  for shDcn2; CD4<sup>+</sup> T cells:  $p = 0.1301$  for shDcn1,  $p > 0.9999$  for shDcn2; CD8<sup>+</sup> T cells:  $p = 0.25$  for shDcn1,  $p > 0.9999$  for shDcn2; Treg cells:  $p = 0.25$  for shDcn1 and shDcn2) (Mann-Whitney test).



# Supplementary Figure 4

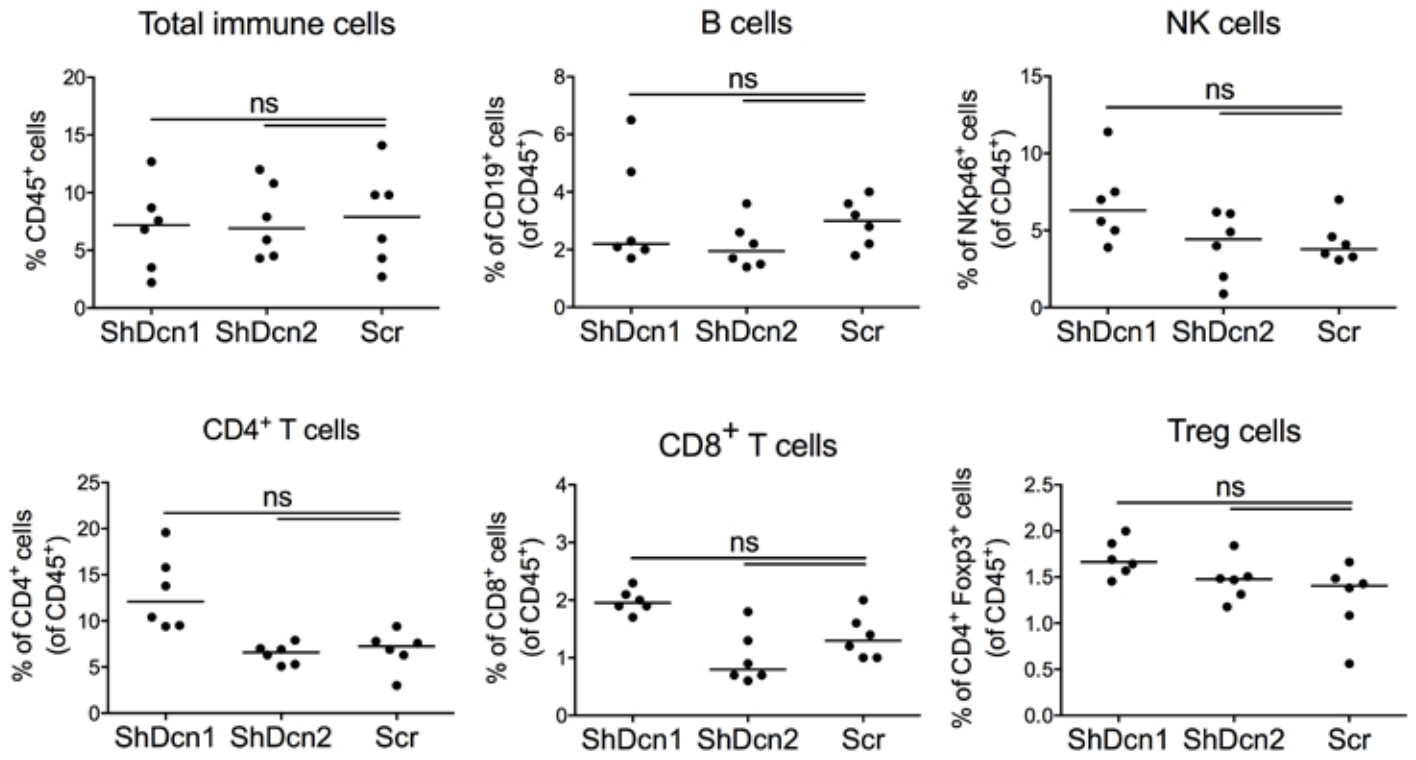

**Supplementary figure 5: Two additional independent analyses confirm that decorin is overexpressed in human MIBC as compared to NMIBC.**

Decorin (*DCN*) mRNA expression was determined A: in our CIT set of 176 human bladder tumors using Affymetrix exon1.0st array and B: in three independent publicly-available datasets of human bladder tumors (Sanchez-Carbayo et al, 2006; Lindgren et al, 2010; Riester et al, 2012). Ta, T1 = non-muscle-invasive bladder carcinoma (NMIBC); T234 = Muscle-Invasive bladder carcinoma (MIBC).

A

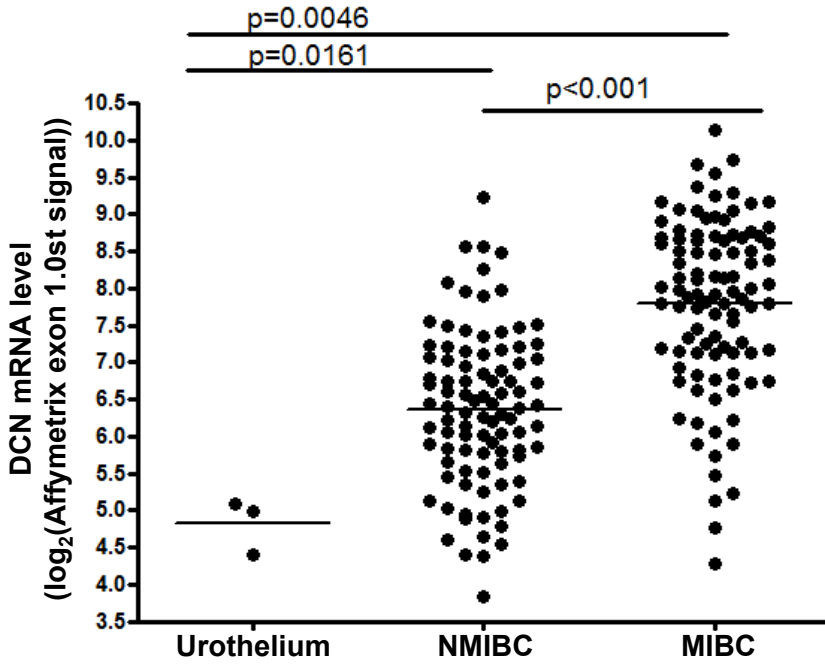

B

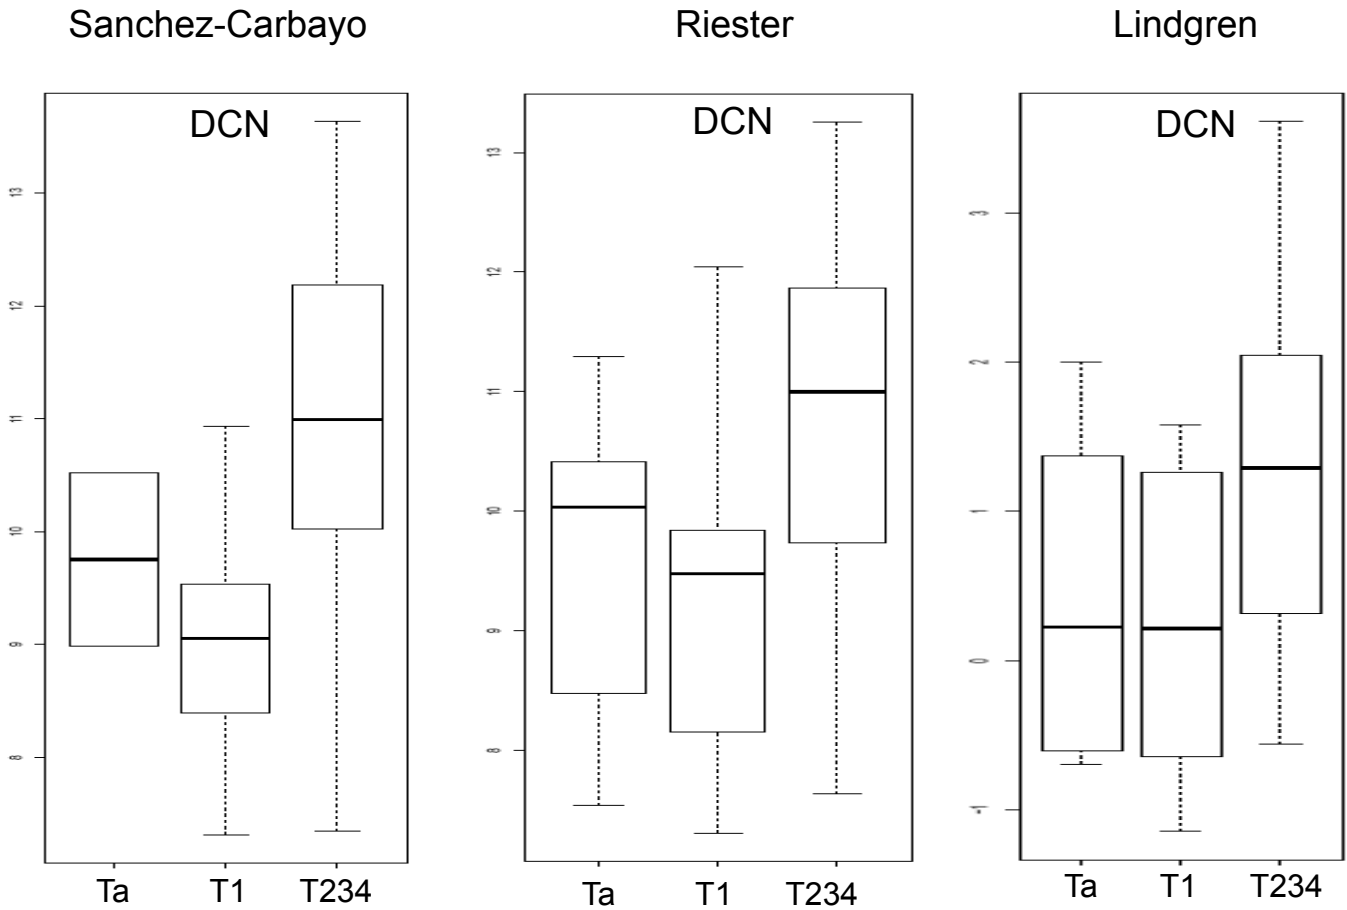

**Supplementary figure 6: *DCN* mRNA level is not correlated to *DCN* DNA level in bladder tumors.**

Linear regression analysis of the 153 bladder carcinomas for which we had both comparative genomic hybridization (CGH) and expression data. The Affymetrix signal (U133plus2.0) and the CGH  $\log_2$ -ratio ( $\log_2(\text{DNA copy number}/2)$ ) were compared, using Spearman's correlation test. Expression levels were considered significantly modified with respect to DNA copy number if  $p < 0.05$ .

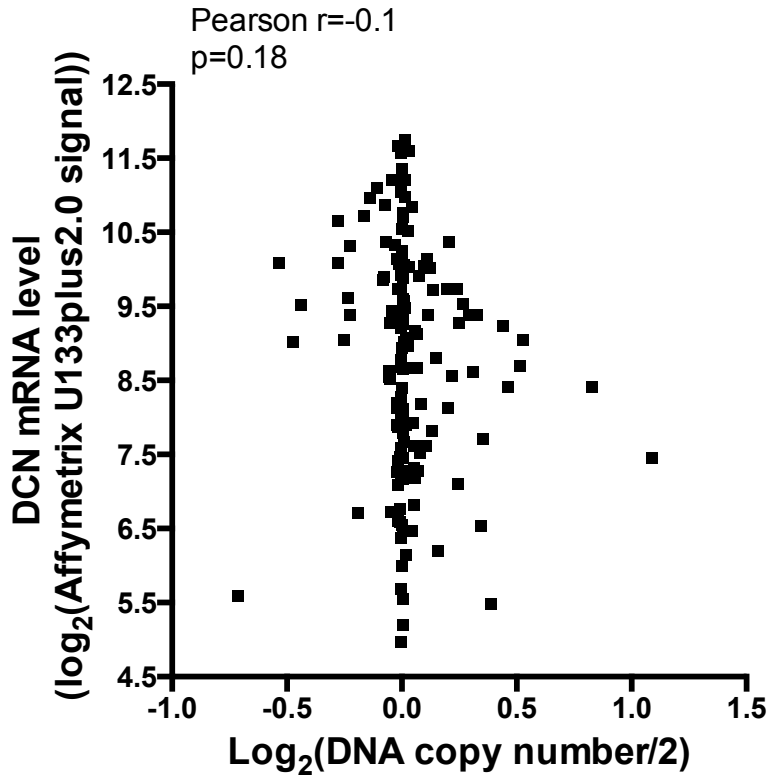

**Supplementary figure 7: Gene ontology annotation enriched within genes correlated to *DCN*.**

GO enrichment in genes positively correlated to *DCN* in human MIBC (pearson's correlation,  $p < 1.10^{-6}$  and  $R > 0.5$ ) was determined using GoRilla application ( $p\text{-value} < 1.10^{-9}$ ).

# Supplementary figure 7

*P-value color scale*

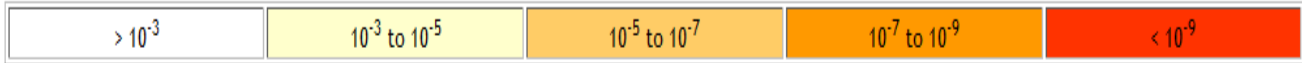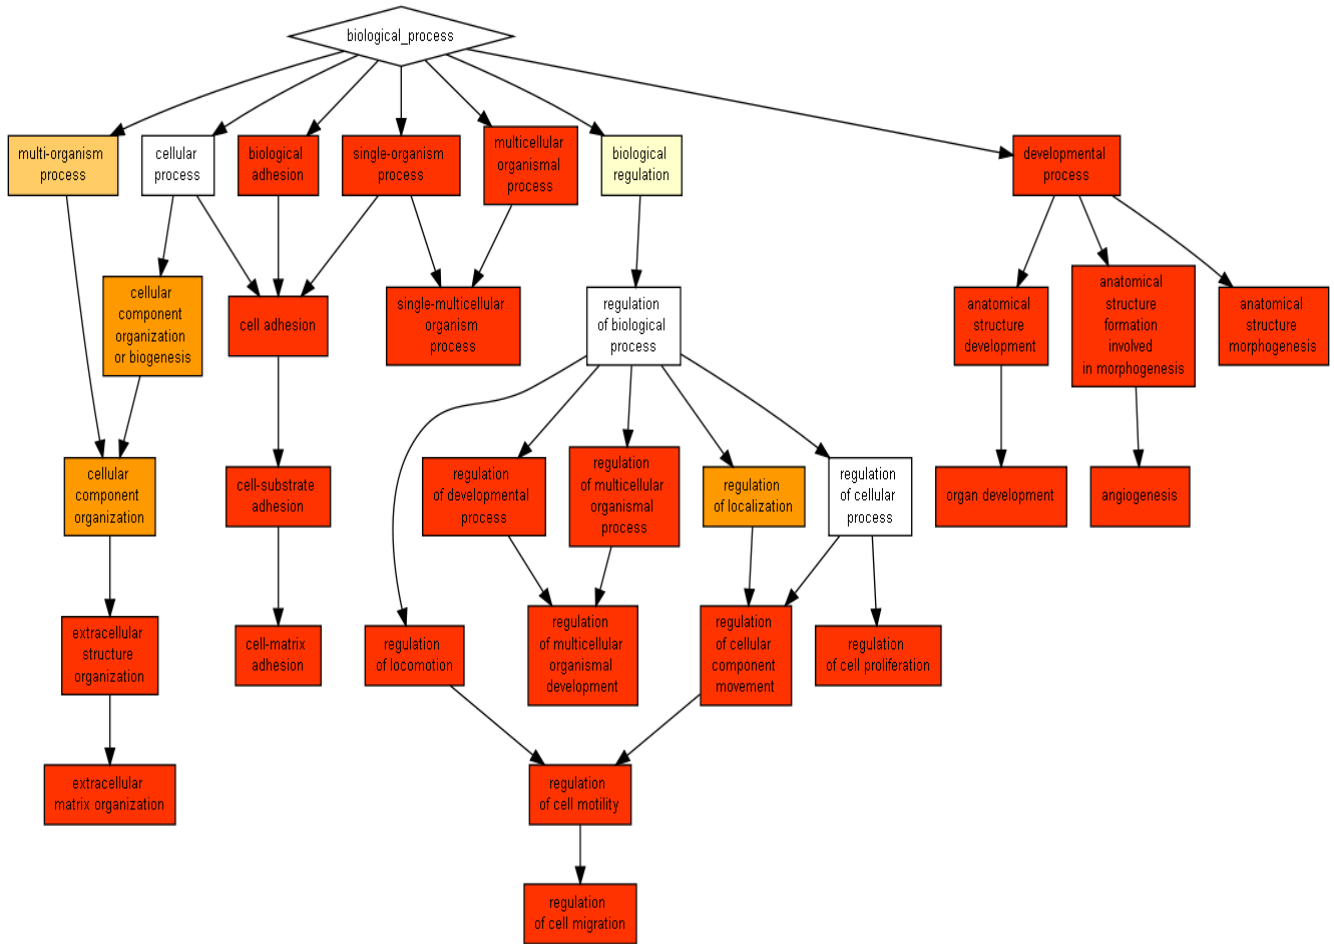

**Supplementary figure 8: Decorin is not required for *in vitro* proliferation of TCCSUP, and promotes matrigel invasion by MB49 and MB49-I cells *in vitro*.**

A: *In vitro* growth of TCCSUP transduced with shDCN1, shDCN2 or Scr quantified during 48h using Cell Titer blue viability assay.

B-C: Quantification of matrigel invasion by MB49 and MB49-I using the xCELLigence device. Cells were seeded in the upper chamber containing matrigel of CIM-plates. Slope values of the cell index was calculated 36h after cell seeding, in 2-3 individual wells of 4 independent experiments. B: quantification of slope values in MB49-Dcn as compared to MB49-pCMV (considered as 100%). \*:  $p=0.031$ , 2-way ANOVA followed by Tukey's post-Hoc test (on raw values of each experiment, with medium alone as additional condition). C: Quantification of slope values in MB49I-shDcn1 and MB49-I-shDcn2 as compared to MB49-I-Scr (considered as 100%). \*:  $p=0.024$  for shDcn1 compared to Scr,  $p=0.06$  for shDcn2 compared to Scr, 2-way ANOVA followed by Tukey's post-Hoc test (on raw values of each experiment, with medium alone as additional condition).





**Supplementary figure 9: a specific DCN isoform is expressed by muscle cells in bladder.**

A: Decorin (*DCN*) mRNA expression was measured by Affymetrix U133plus2.0 array in urothelium and muscle from bladder samples. B: Expression of decorin (*DCN*) protein in a section of a normal bladder showing absence of labeling in urothelial cells but strong expression by smooth muscle cells. Scale bar 100  $\mu\text{m}$ . Picture was extracted from the human protein atlas portal (<http://www.proteinatlas.org/>). C: *DCN* exon array profiles from 106 MIBC tumors (red), 101 NMIBC tumors (green), 4 normal urothelium samples (blue) and 5 bladder muscle samples (purple). Individual sample expression values are plotted for each targeted exon on Affymetrix exon1.0st array, and drawn lines join the median values for each sample group on each exon. Transcripts 1 and 2 are known transcripts referenced in Ensembl database (<http://www.ensembl.org/>). The third transcript structure suggests the use in urothelial cells of several putative first exons already referenced by Ensembl. First exons of transcripts 1 and 2 seem to be only expressed in muscle samples. We therefore hypothesize that urothelial samples rather express transcripts using one of the first exons drawn in black. The observed overexpression of *DCN* gene in MIBC samples does not correspond to an overexpression of transcript 1 and 2 given their first exons expression profile. This ensures that overexpression of *DCN* in MIBC is not the result of a contamination by muscle cells.



**Supplementary Table 1: Genes with mRNA expression level correlated or anticorrelated to *DCN* expression level in human MIBC.**

Threshold p-value  $< 1.10^{-6}$ ,  $[R] > 0.5$ .

Supplementary Table1:

Genes with mRNA expression level correlated or anticorrelated to DCN expression level in human MIBC.

Threshold  $p < 1E-6$ ,  $|R| > 0.5$ 

| Symbol   | Gene name                                                                                              | Pearson     | P-value |
|----------|--------------------------------------------------------------------------------------------------------|-------------|---------|
| DCN      | decorin                                                                                                | 1           | 0       |
| LUM      | lumican                                                                                                | 0,910764984 | 0       |
| CDH11    | cadherin 11, type 2, OB-cadherin (osteoblast)                                                          | 0,90145749  | 0       |
| COL6A3   | collagen, type VI, alpha 3                                                                             | 0,899155107 | 0       |
| SERPINF1 | serpin peptidase inhibitor, clade F (alpha-2 antiplasmin, pigment epithelium derived factor), member 1 | 0,871870156 | 0       |
| RARRES2  | retinoic acid receptor responder (tazarotene induced) 2                                                | 0,863819733 | 0       |
| COL3A1   | collagen, type III, alpha 1                                                                            | 0,860517682 | 0       |
| ACTA2    | actin, alpha 2, smooth muscle, aorta                                                                   | 0,857753487 | 0       |
| SPARC    | secreted protein, acidic, cysteine-rich (osteonectin)                                                  | 0,856986043 | 0       |
| FBN1     | fibrillin 1                                                                                            | 0,849373187 | 0       |
| HEPH     | hephaestin                                                                                             | 0,846801428 | 0       |
| COL1A2   | collagen, type I, alpha 2                                                                              | 0,842476651 | 0       |
| CTSK     | cathepsin K                                                                                            | 0,841029438 | 0       |
| GLT8D2   | glycosyltransferase 8 domain containing 2                                                              | 0,836292453 | 0       |
| TAGLN    | transgelin                                                                                             | 0,835657024 | 0       |
| COL6A2   | collagen, type VI, alpha 2                                                                             | 0,834324908 | 0       |
| SPON1    | spondin 1, extracellular matrix protein                                                                | 0,832498364 | 0       |
| SFRP2    | secreted frizzled-related protein 2                                                                    | 0,829617806 | 0       |
| MMP2     | matrix metalloproteinase 2 (gelatinase A, 72kDa gelatinase, 72kDa type IV collagenase)                 | 0,829464196 | 0       |
| CD248    | CD248 molecule, endosialin                                                                             | 0,821211379 | 0       |
| COL5A1   | collagen, type V, alpha 1                                                                              | 0,819333126 | 0       |
| GPR124   | G protein-coupled receptor 124                                                                         | 0,817253785 | 0       |
| MYLK     | myosin light chain kinase                                                                              | 0,816676378 | 0       |
| PCOLCE   | procollagen C-endopeptidase enhancer                                                                   | 0,814330236 | 0       |
| OLFML1   | olfactomedin-like 1                                                                                    | 0,812065175 | 0       |
| CALD1    | caldesmon 1                                                                                            | 0,810365928 | 0       |
| PALLD    | palladin, cytoskeletal associated protein                                                              | 0,808822783 | 0       |
| PDLIM3   | PDZ and LIM domain 3                                                                                   | 0,804765357 | 0       |
| DDR2     | discoidin domain receptor tyrosine kinase 2                                                            | 0,803772521 | 0       |
| FILIP1L  | filamin A interacting protein 1-like                                                                   | 0,802232185 | 0       |
| OLFML3   | olfactomedin-like 3                                                                                    | 0,799776397 | 0       |
| AEBP1    | AE binding protein 1                                                                                   | 0,796061551 | 0       |
| CCDC80   | coiled-coil domain containing 80                                                                       | 0,793936246 | 0       |
| POSTN    | periostin, osteoblast specific factor                                                                  | 0,791791302 | 0       |
| LHFP     | lipoma HMGIC fusion partner                                                                            | 0,790407917 | 0       |
| C1S      | complement component 1, s subcomponent                                                                 | 0,787778931 | 0       |
| COL1A1   | collagen, type I, alpha 1                                                                              | 0,787460844 | 0       |
| MYL9     | myosin, light chain 9, regulatory                                                                      | 0,784395387 | 0       |
| CRISPLD2 | cysteine-rich secretory protein LCCL domain containing 2                                               | 0,781132715 | 0       |
| ANGPTL2  | angiopoietin-like 2                                                                                    | 0,780900441 | 0       |
| PDGFRB   | platelet-derived growth factor receptor, beta polypeptide                                              | 0,777708178 | 0       |
| COL15A1  | collagen, type XV, alpha 1                                                                             | 0,775416911 | 0       |
| HTRA1    | HtrA serine peptidase 1                                                                                | 0,775202897 | 0       |
| ACTG2    | actin, gamma 2, smooth muscle, enteric                                                                 | 0,774548563 | 0       |
| EMILIN1  | elastin microfibril interfacier 1                                                                      | 0,772520548 | 0       |
| MXRA8    | matrix-remodelling associated 8                                                                        | 0,771987478 | 0       |
| ECM2     | extracellular matrix protein 2, female organ and adipocyte specific                                    | 0,770057236 | 0       |
| LRRC32   | leucine rich repeat containing 32                                                                      | 0,770008715 | 0       |
| TGFB3    | transforming growth factor, beta 3                                                                     | 0,76990014  | 0       |
| TCF4     | transcription factor 4                                                                                 | 0,766397398 | 0       |
| EFEMP2   | EGF-containing fibulin-like extracellular matrix protein 2                                             | 0,766240054 | 0       |
| NID2     | nidogen 2 (osteonidogen)                                                                               | 0,76458498  | 0       |
| TGFB111  | transforming growth factor beta 1 induced transcript 1                                                 | 0,760609978 | 0       |
| ZNF521   | zinc finger protein 521                                                                                | 0,759753366 | 0       |
| GREM1    | gremlin 1, cysteine knot superfamily, homolog (Xenopus laevis)                                         | 0,758842524 | 0       |
| VCAN     | versican                                                                                               | 0,753934739 | 0       |
| LAMA2    | laminin, alpha 2                                                                                       | 0,753773336 | 0       |
| COL6A1   | collagen, type VI, alpha 1                                                                             | 0,753451175 | 0       |

|           |                                                                   |             |          |
|-----------|-------------------------------------------------------------------|-------------|----------|
| C1R       | complement component 1, r subcomponent                            | 0,751236769 | 0        |
| PXDN      | peroxidasin homolog (Drosophila)                                  | 0,751212158 | 0        |
| CXCL12    | chemokine (C-X-C motif) ligand 12 (stromal cell-derived factor 1) | 0,751170054 | 0        |
| EDNRA     | endothelin receptor type A                                        | 0,750066165 | 0        |
| COL16A1   | collagen, type XVI, alpha 1                                       | 0,7499073   | 0        |
| PDGFRA    | platelet-derived growth factor receptor, alpha polypeptide        | 0,748544459 | 0        |
| LDB2      | LIM domain binding 2                                              | 0,747017214 | 0        |
| SPARCL1   | SPARC-like 1 (hevin)                                              | 0,74609417  | 0        |
| TIMP2     | TIMP metalloproteinase inhibitor 2                                | 0,744101397 | 0        |
| THBS2     | thrombospondin 2                                                  | 0,743365479 | 0        |
| SMOC2     | SPARC related modular calcium binding 2                           | 0,743157324 | 0        |
| MSRB3     | methionine sulfoxide reductase B3                                 | 0,74306473  | 0        |
| AOC3      | amine oxidase, copper containing 3 (vascular adhesion protein 1)  | 0,741318866 | 0        |
| ANTXR1    | anthrax toxin receptor 1                                          | 0,736314716 | 0        |
| COL5A2    | collagen, type V, alpha 2                                         | 0,736252012 | 0        |
| COX7A1    | cytochrome c oxidase subunit VIIa polypeptide 1 (muscle)          | 0,736051819 | 0        |
| CNRIP1    | cannabinoid receptor interacting protein 1                        | 0,735952487 | 0        |
| THY1      | Thy-1 cell surface antigen                                        | 0,735508242 | 0        |
| VIM       | vimentin                                                          | 0,735414534 | 0        |
| ANXA6     | annexin A6                                                        | 0,735138358 | 0        |
| IGFBP7    | insulin-like growth factor binding protein 7                      | 0,734560609 | 2,22E-16 |
| PRRX1     | paired related homeobox 1                                         | 0,733576137 | 2,22E-16 |
| EBF1      | early B-cell factor 1                                             | 0,732159546 | 2,22E-16 |
| MEG3      | maternally expressed 3 (non-protein coding)                       | 0,731226351 | 2,22E-16 |
| FMOD      | fibromodulin                                                      | 0,73087928  | 4,44E-16 |
| ZCCHC24   | zinc finger, CCHC domain containing 24                            | 0,729722695 | 4,44E-16 |
| COL14A1   | collagen, type XIV, alpha 1                                       | 0,727613073 | 4,44E-16 |
| PRICKLE2  | prickle homolog 2 (Drosophila)                                    | 0,726122011 | 4,44E-16 |
| LOC387763 | hypothetical protein LOC387763                                    | 0,723820033 | 8,88E-16 |
| C4orf18   | chromosome 4 open reading frame 18                                | 0,72267347  | 8,88E-16 |
| MXRA5     | matrix-remodelling associated 5                                   | 0,722047478 | 8,88E-16 |
| LMCD1     | LIM and cysteine-rich domains 1                                   | 0,721000611 | 1,11E-15 |
| IGDCC4    | immunoglobulin superfamily, DCC subclass, member 4                | 0,720546115 | 1,33E-15 |
| C1QTNF5   | C1q and tumor necrosis factor related protein 5                   | 0,719697295 | 1,33E-15 |
| RHOJ      | ras homolog gene family, member J                                 | 0,716822955 | 1,78E-15 |
| KCTD12    | potassium channel tetramerisation domain containing 12            | 0,716099548 | 2,22E-15 |
| MFAP4     | microfibrillar-associated protein 4                               | 0,713428455 | 3,11E-15 |
| TPM2      | tropomyosin 2 (beta)                                              | 0,711900441 | 3,55E-15 |
| PTRF      | polymerase I and transcript release factor                        | 0,711444548 | 4,00E-15 |
| FBLN5     | fibulin 5                                                         | 0,710908386 | 4,22E-15 |
| ELTD1     | EGF, latrophilin and seven transmembrane domain containing 1      | 0,710787132 | 4,22E-15 |
| ABI3BP    | ABI family, member 3 (NESH) binding protein                       | 0,710168968 | 4,44E-15 |
| MRV1      | murine retrovirus integration site 1 homolog                      | 0,709217774 | 5,33E-15 |
| MYADM     | myeloid-associated differentiation marker                         | 0,707357686 | 6,66E-15 |
| MRC2      | mannose receptor, C type 2                                        | 0,706943212 | 6,88E-15 |
| ZFPM2     | zinc finger protein, multitype 2                                  | 0,705834017 | 7,99E-15 |
| VCAM1     | vascular cell adhesion molecule 1                                 | 0,702712741 | 1,15E-14 |
| ISLR      | immunoglobulin superfamily containing leucine-rich repeat         | 0,70156859  | 1,33E-14 |
| BOC       | Boc homolog (mouse)                                               | 0,700355519 | 1,55E-14 |
| THBS1     | thrombospondin 1                                                  | 0,700010882 | 1,62E-14 |
| BGN       | biglycan                                                          | 0,698730548 | 1,91E-14 |
| FLNA      | filamin A, alpha                                                  | 0,696038289 | 2,62E-14 |
| MFGE8     | milk fat globule-EGF factor 8 protein                             | 0,692796603 | 3,86E-14 |
| FBLN2     | fibulin 2                                                         | 0,692248194 | 4,13E-14 |
| LAMA4     | laminin, alpha 4                                                  | 0,692200962 | 4,15E-14 |
| ENTPD1    | ectonucleoside triphosphate diphosphohydrolase 1                  | 0,692101834 | 4,22E-14 |
| COL8A2    | collagen, type VIII, alpha 2                                      | 0,691383174 | 4,57E-14 |
| PDZRN3    | PDZ domain containing ring finger 3                               | 0,688952627 | 6,08E-14 |
| FSTL1     | follicle-stimulating-like 1                                       | 0,688616576 | 6,33E-14 |
| TPM1      | tropomyosin 1 (alpha)                                             | 0,688483728 | 6,44E-14 |
| CNN1      | calponin 1, basic, smooth muscle                                  | 0,688039785 | 6,77E-14 |
| MXRA7     | matrix-remodelling associated 7                                   | 0,687535218 | 7,19E-14 |
| IGF1      | insulin-like growth factor 1 (somatomedin C)                      | 0,687223247 | 7,46E-14 |

|              |                                                                                   |             |          |
|--------------|-----------------------------------------------------------------------------------|-------------|----------|
| CPXM1        | carboxypeptidase X (M14 family), member 1                                         | 0,686910551 | 7,73E-14 |
| SULF1        | sulfatase 1                                                                       | 0,686227943 | 8,35E-14 |
| FOXF1        | forkhead box F1                                                                   | 0,68513021  | 9,48E-14 |
| MFAP5        | microfibrillar associated protein 5                                               | 0,682863446 | 1,23E-13 |
| DAAM2        | dishevelled associated activator of morphogenesis 2                               | 0,682596188 | 1,27E-13 |
| SELM         | selenoprotein M                                                                   | 0,682008002 | 1,35E-13 |
| PLN          | phospholamban                                                                     | 0,681901054 | 1,37E-13 |
| GEM          | GTP binding protein overexpressed in skeletal muscle                              | 0,681379933 | 1,46E-13 |
| RCAN2        | regulator of calcineurin 2                                                        | 0,679209618 | 1,86E-13 |
| PRKCDBP      | protein kinase C, delta binding protein                                           | 0,67864204  | 1,98E-13 |
| RASL12       | RAS-like, family 12                                                               | 0,677872537 | 2,16E-13 |
| LOC100128178 | similar to hCG2041313                                                             | 0,67700306  | 2,38E-13 |
| MCAM         | melanoma cell adhesion molecule                                                   | 0,676684866 | 2,46E-13 |
| A2M          | alpha-2-macroglobulin                                                             | 0,676603169 | 2,49E-13 |
| DACT1        | dapper, antagonist of beta-catenin, homolog 1 (Xenopus laevis)                    | 0,676312533 | 2,57E-13 |
| RGS2         | regulator of G-protein signaling 2, 24kDa                                         | 0,675839153 | 2,71E-13 |
| GAS6         | growth arrest-specific 6                                                          | 0,675206933 | 2,90E-13 |
| CTHRC1       | collagen triple helix repeat containing 1                                         | 0,674573318 | 3,12E-13 |
| GLT8D4       | glycosyltransferase 8 domain containing 4                                         | 0,673977632 | 3,33E-13 |
| PODN         | podocan                                                                           | 0,673270824 | 3,60E-13 |
| CPXM2        | carboxypeptidase X (M14 family), member 2                                         | 0,673163933 | 3,64E-13 |
| DCHS1        | dachsous 1 (Drosophila)                                                           | 0,672972671 | 3,72E-13 |
| KCNJ8        | potassium inwardly-rectifying channel, subfamily J, member 8                      | 0,671937969 | 4,16E-13 |
| IFFO1        | intermediate filament family orphan 1                                             | 0,671098313 | 4,56E-13 |
| EMCN         | endomucin                                                                         | 0,670270164 | 4,99E-13 |
| SH3RF3       | SH3 domain containing ring finger 3                                               | 0,669737488 | 5,28E-13 |
| TSPAN4       | tetraspanin 4                                                                     | 0,66730051  | 6,87E-13 |
| P4HA3        | prolyl 4-hydroxylase, alpha polypeptide III                                       | 0,666536518 | 7,46E-13 |
| BNC2         | basonuclin 2                                                                      | 0,666353747 | 7,61E-13 |
| LRRN4CL      | LRRN4 C-terminal like                                                             | 0,665987123 | 7,91E-13 |
| HEG1         | HEG homolog 1 (zebrafish)                                                         | 0,664571509 | 9,20E-13 |
| SGK269       | NKF3 kinase family member                                                         | 0,664309429 | 9,46E-13 |
| CPA3         | carboxypeptidase A3 (mast cell)                                                   | 0,662039289 | 1,20E-12 |
| COL4A2       | collagen, type IV, alpha 2                                                        | 0,661555618 | 1,26E-12 |
| FGF7         | fibroblast growth factor 7 (keratinocyte growth factor)                           | 0,660510665 | 1,41E-12 |
| TNS1         | tensin 1                                                                          | 0,660369193 | 1,43E-12 |
| TMEM119      | transmembrane protein 119                                                         | 0,660008752 | 1,49E-12 |
| FHL1         | four and a half LIM domains 1                                                     | 0,658999391 | 1,65E-12 |
| FBXL7        | F-box and leucine-rich repeat protein 7                                           | 0,658197754 | 1,80E-12 |
| COPZ2        | coatamer protein complex, subunit zeta 2                                          | 0,656936825 | 2,05E-12 |
| GAS1         | growth arrest-specific 1                                                          | 0,656747355 | 2,09E-12 |
| JAM2         | junctional adhesion molecule 2                                                    | 0,656074017 | 2,24E-12 |
| EFEMP1       | EGF-containing fibulin-like extracellular matrix protein 1                        | 0,6551292   | 2,46E-12 |
| MGP          | matrix Gla protein                                                                | 0,653833302 | 2,81E-12 |
| GYPC         | glycophorin C (Gerbich blood group)                                               | 0,653752722 | 2,83E-12 |
| RECK         | reversion-inducing-cysteine-rich protein with kazal motifs                        | 0,653740723 | 2,84E-12 |
| FERMT2       | fermitin family homolog 2 (Drosophila)                                            | 0,653077894 | 3,04E-12 |
| GAS7         | growth arrest-specific 7                                                          | 0,652926089 | 3,08E-12 |
| CDH5         | cadherin 5, type 2 (vascular endothelium)                                         | 0,652670712 | 3,16E-12 |
| NID1         | nidogen 1                                                                         | 0,652405919 | 3,25E-12 |
| BAG2         | BCL2-associated athanogene 2                                                      | 0,652382276 | 3,26E-12 |
| PECAM1       | platelet/endothelial cell adhesion molecule                                       | 0,651951531 | 3,40E-12 |
| GATA6        | GATA binding protein 6                                                            | 0,651734702 | 3,48E-12 |
| KANK2        | KN motif and ankyrin repeat domains 2                                             | 0,650343424 | 4,00E-12 |
| MYH11        | myosin, heavy chain 11, smooth muscle                                             | 0,649789364 | 4,23E-12 |
| STARD13      | StAR-related lipid transfer (START) domain containing 13                          | 0,647174548 | 5,50E-12 |
| PDPN         | podoplanin                                                                        | 0,646457316 | 5,90E-12 |
| SRPX         | sushi-repeat-containing protein, X-linked                                         | 0,645426411 | 6,54E-12 |
| CD93         | CD93 molecule                                                                     | 0,644879544 | 6,90E-12 |
| PTGDS        | prostaglandin D2 synthase 21kDa (brain)                                           | 0,643652163 | 7,79E-12 |
| KCNMB1       | potassium large conductance calcium-activated channel, subfamily M, beta member 1 | 0,643599474 | 7,83E-12 |
| COL18A1      | collagen, type XVIII, alpha 1                                                     | 0,640821734 | 1,03E-11 |
| PAPSS2       | 3'-phosphoadenosine 5'-phosphosulfate synthase 2                                  | 0,638715847 | 1,26E-11 |
| TMEM176B     | transmembrane protein 176B                                                        | 0,638148516 | 1,33E-11 |

|            |                                                               |             |          |
|------------|---------------------------------------------------------------|-------------|----------|
| ASPN       | asporin                                                       | 0,636827301 | 1,51E-11 |
| GJA4       | gap junction protein, alpha 4, 37kDa                          | 0,636764884 | 1,52E-11 |
| NNMT       | nicotinamide N-methyltransferase                              | 0,63675452  | 1,52E-11 |
| PDGFC      | platelet derived growth factor C                              | 0,636044575 | 1,63E-11 |
| SNORD114-3 | small nucleolar RNA, C/D box 114-3                            | 0,634380718 | 1,91E-11 |
| CSGALNACT1 | chondroitin sulfate N-acetylgalactosaminyltransferase 1       | 0,634004002 | 1,97E-11 |
| ATP8B2     | ATPase, class I, type 8B, member 2                            | 0,63369315  | 2,03E-11 |
| EMP3       | epithelial membrane protein 3                                 | 0,633329149 | 2,11E-11 |
| AQP1       | aquaporin 1 (Colton blood group)                              | 0,631486337 | 2,50E-11 |
| S1PR1      | sphingosine-1-phosphate receptor 1                            | 0,630538054 | 2,74E-11 |
| MOXD1      | monooxygenase, DBH-like 1                                     | 0,629579843 | 2,99E-11 |
| FN1        | fibronectin 1                                                 | 0,628417849 | 3,34E-11 |
| EPB41L2    | erythrocyte membrane protein band 4.1-like 2                  | 0,628094494 | 3,44E-11 |
| MARVELD1   | MARVEL domain containing 1                                    | 0,628055304 | 3,45E-11 |
| KCNE4      | potassium voltage-gated channel, Isk-related family, member 4 | 0,626763906 | 3,89E-11 |
| COLEC12    | collectin sub-family member 12                                | 0,624951197 | 4,59E-11 |
| PARVA      | parvin, alpha                                                 | 0,623574682 | 5,21E-11 |
| CD200      | CD200 molecule                                                | 0,622902205 | 5,54E-11 |
| ZEB1       | zinc finger E-box binding homeobox 1                          | 0,622364437 | 5,82E-11 |
| TMEM158    | transmembrane protein 158                                     | 0,622022234 | 6,00E-11 |
| ARHGAP24   | Rho GTPase activating protein 24                              | 0,621117122 | 6,52E-11 |
| HSD17B6    | hydroxysteroid (17-beta) dehydrogenase 6 homolog (mouse)      | 0,62106144  | 6,55E-11 |
| FNDC1      | fibronectin type III domain containing 1                      | 0,620108345 | 7,14E-11 |
| ACTC1      | actin, alpha, cardiac muscle 1                                | 0,617124243 | 9,33E-11 |
| CTGF       | connective tissue growth factor                               | 0,616841262 | 9,57E-11 |
| LGALS1     | lectin, galactoside-binding, soluble, 1                       | 0,616026272 | 1,03E-10 |
| CCL11      | chemokine (C-C motif) ligand 11                               | 0,615906063 | 1,04E-10 |
| ADCY4      | adenylate cyclase 4                                           | 0,615253135 | 1,10E-10 |
| ALPK2      | alpha-kinase 2                                                | 0,614932039 | 1,13E-10 |
| RBMS3      | RNA binding motif, single stranded interacting protein        | 0,612223113 | 1,44E-10 |
| ANTXR2     | anthrax toxin receptor 2                                      | 0,611191621 | 1,58E-10 |
| CSRP1      | cysteine and glycine-rich protein 1                           | 0,610952504 | 1,61E-10 |
| LTBP1      | latent transforming growth factor beta binding protein 1      | 0,610915329 | 1,61E-10 |
| TSHZ3      | teashirt zinc finger homeobox 3                               | 0,610613798 | 1,66E-10 |
| PCDH18     | protocadherin 18                                              | 0,609952757 | 1,76E-10 |
| LOXL1      | lysyl oxidase-like 1                                          | 0,609750415 | 1,79E-10 |
| RAB23      | RAB23, member RAS oncogene family                             | 0,608387583 | 2,01E-10 |
| PLXDC1     | plexin domain containing 1                                    | 0,607981941 | 2,08E-10 |
| ACVRL1     | activin A receptor type II-like 1                             | 0,60766816  | 2,14E-10 |
| TNC        | tenascin C                                                    | 0,607554165 | 2,16E-10 |
| SYNPO2     | synaptopodin 2                                                | 0,606145289 | 2,44E-10 |
| AXL        | AXL receptor tyrosine kinase                                  | 0,605677223 | 2,54E-10 |
| DPT        | dermatopontin                                                 | 0,605544162 | 2,57E-10 |
| COL4A1     | collagen, type IV, alpha 1                                    | 0,604378204 | 2,84E-10 |
| PMP22      | peripheral myelin protein 22                                  | 0,60437081  | 2,84E-10 |
| DPYSL3     | dihydropyrimidinase-like 3                                    | 0,603819229 | 2,98E-10 |
| PPP1R14A   | protein phosphatase 1, regulatory (inhibitor) subunit 14A     | 0,603205273 | 3,14E-10 |
| PLSCR4     | phospholipid scramblase 4                                     | 0,602620326 | 3,30E-10 |
| TIMP1      | TIMP metalloproteinase inhibitor 1                            | 0,602442121 | 3,35E-10 |
| TMEM200A   | transmembrane protein 200A                                    | 0,601791639 | 3,54E-10 |
| MITF       | microphthalmia-associated transcription factor                | 0,601536895 | 3,61E-10 |
| SYNM       | synemin, intermediate filament protein                        | 0,601133308 | 3,74E-10 |
| SGCD       | sarcoglycan, delta (35kDa dystrophin-associated glycoprotein) | 0,600918302 | 3,81E-10 |
| ARMCX1     | armadillo repeat containing, X-linked 1                       | 0,597835047 | 4,93E-10 |
| GLIPR1     | GLI pathogenesis-related 1                                    | 0,596079795 | 5,70E-10 |
| SORBS1     | sorbin and SH3 domain containing 1                            | 0,59595683  | 5,76E-10 |
| HSPB6      | heat shock protein, alpha-crystallin-related, B6              | 0,595711668 | 5,88E-10 |
| CYR61      | cysteine-rich, angiogenic inducer, 61                         | 0,59541848  | 6,03E-10 |
| CCDC3      | coiled-coil domain containing 3                               | 0,595046363 | 6,21E-10 |
| ITGA5      | integrin, alpha 5 (fibronectin receptor, alpha polypeptide)   | 0,593667494 | 6,96E-10 |
| PHLDB1     | pleckstrin homology-like domain, family B, member 1           | 0,593635897 | 6,98E-10 |
| GLIS2      | GLIS family zinc finger 2                                     | 0,593624208 | 6,99E-10 |
| PKIG       | protein kinase (cAMP-dependent, catalytic) inhibitor gamma    | 0,593623349 | 6,99E-10 |
| DPYSL2     | dihydropyrimidinase-like 2                                    | 0,591797762 | 8,12E-10 |



|          |                                                                                         |             |          |
|----------|-----------------------------------------------------------------------------------------|-------------|----------|
| TIE1     | tyrosine kinase with immunoglobulin-like and EGF-like domains 1                         | 0,590839187 | 8,78E-10 |
| CCND2    | cyclin D2                                                                               | 0,590702725 | 8,87E-10 |
| CH25H    | cholesterol 25-hydroxylase                                                              | 0,589997575 | 9,40E-10 |
| ZEB2     | zinc finger E-box binding homeobox 2                                                    | 0,589321881 | 9,93E-10 |
| PPP3CC   | protein phosphatase 3 (formerly 2B), catalytic subunit, gamma isoform                   | 0,587828604 | 1,12E-09 |
| CILP     | cartilage intermediate layer protein, nucleotide pyrophosphohydrolase                   | 0,587358731 | 1,16E-09 |
| PGCP     | plasma glutamate carboxypeptidase                                                       | 0,587144117 | 1,18E-09 |
| SFRP4    | secreted frizzled-related protein 4                                                     | 0,586227106 | 1,27E-09 |
| SMTN     | smoothelin                                                                              | 0,586203088 | 1,28E-09 |
| ELN      | elastin                                                                                 | 0,584902339 | 1,42E-09 |
| DES      | desmin                                                                                  | 0,584049326 | 1,52E-09 |
| TGFB2    | transforming growth factor, beta receptor II (70/80kDa)                                 | 0,583567334 | 1,58E-09 |
| TIMP3    | TIMP metalloproteinase inhibitor 3                                                      | 0,583312725 | 1,61E-09 |
| LMOD1    | leiomodulin 1 (smooth muscle)                                                           | 0,582714603 | 1,69E-09 |
| ITGA11   | integrin, alpha 11                                                                      | 0,582153519 | 1,76E-09 |
| CLEC11A  | C-type lectin domain family 11, member A                                                | 0,581933546 | 1,79E-09 |
| PTGER3   | prostaglandin E receptor 3 (subtype EP3)                                                | 0,580987195 | 1,93E-09 |
| ADH1B    | alcohol dehydrogenase 1B (class I), beta polypeptide                                    | 0,57833498  | 2,38E-09 |
| IFITM2   | interferon induced transmembrane protein 2 (1-8D)                                       | 0,577067005 | 2,63E-09 |
| WFDC1    | WAP four-disulfide core domain 1                                                        | 0,576751926 | 2,69E-09 |
| OGN      | osteoglycin                                                                             | 0,576367488 | 2,77E-09 |
| TWIST2   | twist homolog 2 (Drosophila)                                                            | 0,576272027 | 2,79E-09 |
| TMEM176A | transmembrane protein 176A                                                              | 0,576061504 | 2,84E-09 |
| JAM3     | junctional adhesion molecule 3                                                          | 0,575918584 | 2,87E-09 |
| ROBO4    | roundabout homolog 4, magic roundabout (Drosophila)                                     | 0,574938086 | 3,10E-09 |
| HTRA3    | HtrA serine peptidase 3                                                                 | 0,574801112 | 3,13E-09 |
| SDC2     | syndecan 2                                                                              | 0,574559575 | 3,19E-09 |
| FAP      | fibroblast activation protein, alpha                                                    | 0,574482426 | 3,21E-09 |
| FGFR1    | fibroblast growth factor receptor 1                                                     | 0,573408196 | 3,49E-09 |
| GALNTL2  | UDP-N-acetyl-alpha-D-galactosamine:polypeptide N-acetylgalactosaminyltransferase-like 2 | 0,573226005 | 3,53E-09 |
| RGS5     | regulator of G-protein signaling 5                                                      | 0,572984174 | 3,60E-09 |
| CHRD2    | chordin-like 2                                                                          | 0,572927581 | 3,62E-09 |
| GGTA1    | glycoprotein, alpha-galactosyltransferase 1                                             | 0,572918991 | 3,62E-09 |
| ZAK      | sterile alpha motif and leucine zipper containing kinase AZK                            | 0,571340599 | 4,08E-09 |
| HDC      | histidine decarboxylase                                                                 | 0,571297795 | 4,10E-09 |
| ZNF469   | zinc finger protein 469                                                                 | 0,570673418 | 4,30E-09 |
| DARC     | Duffy blood group, chemokine receptor                                                   | 0,570127381 | 4,48E-09 |
| VCL      | vinculin                                                                                | 0,570006025 | 4,52E-09 |
| TPSAB1   | tryptase alpha/beta 1                                                                   | 0,568903664 | 4,91E-09 |
| GNG11    | guanine nucleotide binding protein (G protein), gamma 11                                | 0,568383389 | 5,11E-09 |
| GPR116   | G protein-coupled receptor 116                                                          | 0,567912513 | 5,30E-09 |
| CASQ2    | calsequestrin 2 (cardiac muscle)                                                        | 0,567868094 | 5,31E-09 |
| APLNR    | apelin receptor                                                                         | 0,566980195 | 5,68E-09 |
| STOM     | stomatin                                                                                | 0,566708987 | 5,80E-09 |
| NDN      | necdin homolog (mouse)                                                                  | 0,566324385 | 5,97E-09 |
| TPST1    | tyrosylprotein sulfotransferase 1                                                       | 0,566100178 | 6,07E-09 |
| PLAC9    | placenta-specific 9                                                                     | 0,565741904 | 6,23E-09 |
| SLIT2    | slit homolog 2 (Drosophila)                                                             | 0,565639369 | 6,28E-09 |
| KLF2     | Kruppel-like factor 2 (lung)                                                            | 0,565582184 | 6,31E-09 |
| ACOX2    | acyl-Coenzyme A oxidase 2, branched chain                                               | 0,565570091 | 6,31E-09 |
| TCF21    | transcription factor 21                                                                 | 0,56496174  | 6,61E-09 |
| SHANK3   | SH3 and multiple ankyrin repeat domains 3                                               | 0,563567122 | 7,33E-09 |
| VASN     | vasorin                                                                                 | 0,563550885 | 7,34E-09 |
| EGR2     | early growth response 2                                                                 | 0,563476697 | 7,38E-09 |
| CRYAB    | crystallin, alpha B                                                                     | 0,563025045 | 7,63E-09 |
| HSPA12A  | heat shock 70kDa protein 12A                                                            | 0,560831946 | 8,98E-09 |
| SDPR     | serum deprivation response (phosphatidylserine binding protein)                         | 0,56050601  | 9,19E-09 |
| NEXN     | nexilin (F actin binding protein)                                                       | 0,559811665 | 9,68E-09 |
| FKBP7    | FK506 binding protein 7                                                                 | 0,559586469 | 9,84E-09 |

|          |                                                                                                                 |             |          |
|----------|-----------------------------------------------------------------------------------------------------------------|-------------|----------|
| SERPINE2 | serpin peptidase inhibitor, clade E (nexin, plasminogen activator inhibitor type 1), member 2                   | 0,55938172  | 9,99E-09 |
| TUBB6    | tubulin, beta 6                                                                                                 | 0,558410911 | 1,07E-08 |
| SGK493   | protein kinase-like protein SgK493                                                                              | 0,558280381 | 1,08E-08 |
| ASAM     | adipocyte-specific adhesion molecule                                                                            | 0,558180827 | 1,09E-08 |
| NEGR1    | neuronal growth regulator 1                                                                                     | 0,557880974 | 1,11E-08 |
| SYNC     | syncoilin, intermediate filament protein                                                                        | 0,557859745 | 1,12E-08 |
| CMAH     | cytidine monophosphate-N-acetylneuraminic acid hydroxylase (CMP-N-acetylneuraminic acid hydroxylase) pseudogene | 0,557740048 | 1,13E-08 |
| SOX17    | SRY (sex determining region Y)-box 17                                                                           | 0,557646571 | 1,13E-08 |
| EHD2     | EH-domain containing 2                                                                                          | 0,557406983 | 1,15E-08 |
| NTM      | neurotrimin                                                                                                     | 0,557278922 | 1,16E-08 |
| PID1     | phosphotyrosine interaction domain containing 1                                                                 | 0,557075964 | 1,18E-08 |
| C13orf33 | chromosome 13 open reading frame 33                                                                             | 0,556861029 | 1,20E-08 |
| CALCRL   | calcitonin receptor-like                                                                                        | 0,555652083 | 1,31E-08 |
| SNED1    | sushi, nidogen and EGF-like domains 1                                                                           | 0,555268318 | 1,35E-08 |
| TMEM204  | transmembrane protein 204                                                                                       | 0,554336779 | 1,44E-08 |
| F13A1    | coagulation factor XIII, A1 polypeptide                                                                         | 0,553570218 | 1,52E-08 |
| ITIH5    | inter-alpha (globulin) inhibitor H5                                                                             | 0,553084172 | 1,58E-08 |
| BHMT2    | betaine-homocysteine methyltransferase 2                                                                        | 0,551197147 | 1,81E-08 |
| CNPY4    | canopy 4 homolog (zebrafish)                                                                                    | 0,550326117 | 1,92E-08 |
| LAMC1    | laminin, gamma 1 (formerly LAMB2)                                                                               | 0,55004351  | 1,96E-08 |
| SH3BGR1  | SH3 domain binding glutamic acid-rich protein like                                                              | 0,549836079 | 1,99E-08 |
| EDNRB    | endothelin receptor type B                                                                                      | 0,548650257 | 2,16E-08 |
| KDR      | kinase insert domain receptor (a type III receptor tyrosine kinase)                                             | 0,548460468 | 2,19E-08 |
| C7orf58  | chromosome 7 open reading frame 58                                                                              | 0,548436084 | 2,20E-08 |
| PRELP    | proline/arginine-rich end leucine-rich repeat protein                                                           | 0,547465244 | 2,35E-08 |
| GUCY1B3  | guanylate cyclase 1, soluble, beta 3                                                                            | 0,546915526 | 2,45E-08 |
| RAMP3    | receptor (G protein-coupled) activity modifying protein 3                                                       | 0,546675249 | 2,49E-08 |
| PLXND1   | plexin D1                                                                                                       | 0,546644649 | 2,49E-08 |
| ACTN1    | actinin, alpha 1                                                                                                | 0,546318174 | 2,55E-08 |
| EFHA2    | EF-hand domain family, member A2                                                                                | 0,546297016 | 2,55E-08 |
| DOK5     | docking protein 5                                                                                               | 0,546173164 | 2,58E-08 |
| RCN3     | reticulocalbin 3, EF-hand calcium binding domain                                                                | 0,546117536 | 2,59E-08 |
| SHE      | Src homology 2 domain containing E                                                                              | 0,545798957 | 2,64E-08 |
| BIN1     | bridging integrator 1                                                                                           | 0,545758579 | 2,65E-08 |
| ITGBL1   | integrin, beta-like 1 (with EGF-like repeat domains)                                                            | 0,545750329 | 2,65E-08 |
| RFTN2    | raftlin family member 2                                                                                         | 0,545435971 | 2,71E-08 |
| WIPF1    | WAS/WASL interacting protein family, member 1                                                                   | 0,545210444 | 2,76E-08 |
| NXN      | nucleoredoxin                                                                                                   | 0,544878073 | 2,82E-08 |
| GPR183   | G protein-coupled receptor 183                                                                                  | 0,544836551 | 2,83E-08 |
| ADAMTS9  | ADAM metalloproteinase with thrombospondin type 1 motif, 9                                                      | 0,544648522 | 2,87E-08 |
| ADRA2A   | adrenergic, alpha-2A-, receptor                                                                                 | 0,54451721  | 2,89E-08 |
| FIBIN    | fin bud initiation factor homolog (zebrafish)                                                                   | 0,544129905 | 2,97E-08 |
| ADAM33   | ADAM metalloproteinase domain 33                                                                                | 0,543432576 | 3,12E-08 |
| FXYD1    | FXYD domain containing ion transport regulator 1                                                                | 0,543335649 | 3,14E-08 |
| DKK3     | dickkopf homolog 3 (Xenopus laevis)                                                                             | 0,542489243 | 3,33E-08 |
| HSPG2    | heparan sulfate proteoglycan 2                                                                                  | 0,542199227 | 3,40E-08 |
| ADAMTS1  | ADAM metalloproteinase with thrombospondin type 1 motif, 1                                                      | 0,541801223 | 3,49E-08 |
| STX2     | syntaxin 2                                                                                                      | 0,54177494  | 3,50E-08 |
| RSPO3    | R-spondin 3 homolog (Xenopus laevis)                                                                            | 0,541388465 | 3,60E-08 |
| MSN      | moesin                                                                                                          | 0,541098464 | 3,67E-08 |
| FLNC     | filamin C, gamma                                                                                                | 0,540936344 | 3,71E-08 |
| FAM26E   | family with sequence similarity 26, member E                                                                    | 0,540926405 | 3,71E-08 |
| CD34     | CD34 molecule                                                                                                   | 0,540792703 | 3,75E-08 |
| PDLIM2   | PDZ and LIM domain 2 (mystique)                                                                                 | 0,540433667 | 3,84E-08 |
| AOX1     | aldehyde oxidase 1                                                                                              | 0,540261487 | 3,89E-08 |
| MEF2C    | myocyte enhancer factor 2C                                                                                      | 0,540024291 | 3,95E-08 |
| ARHGEF17 | Rho guanine nucleotide exchange factor (GEF) 17                                                                 | 0,539705468 | 4,04E-08 |
| SELP     | selectin P (granule membrane protein 140kDa, antigen CD62)                                                      | 0,539515879 | 4,09E-08 |
| LRRC17   | leucine rich repeat containing 17                                                                               | 0,539327915 | 4,14E-08 |
| DLC1     | deleted in liver cancer 1                                                                                       | 0,539289894 | 4,15E-08 |
| HPGDS    | hematopoietic prostaglandin D synthase                                                                          | 0,538420321 | 4,41E-08 |
| LYVE1    | lymphatic vessel endothelial hyaluronan receptor 1                                                              | 0,53768625  | 4,64E-08 |

|             |                                                                                       |             |          |
|-------------|---------------------------------------------------------------------------------------|-------------|----------|
| TENC1       | tensin like C1 domain containing phosphatase (tensin 2)                               | 0,53768339  | 4,64E-08 |
| PPP1R12B    | protein phosphatase 1, regulatory (inhibitor) subunit 12B                             | 0,537588776 | 4,67E-08 |
| MEOX1       | mesenchyme homeobox 1                                                                 | 0,536888781 | 4,90E-08 |
| ALDH2       | aldehyde dehydrogenase 2 family (mitochondrial)                                       | 0,536127999 | 5,16E-08 |
| PTGFR       | prostaglandin F receptor (FP)                                                         | 0,536101886 | 5,16E-08 |
| CAV1        | caveolin 1, caveolae protein, 22kDa                                                   | 0,534748559 | 5,66E-08 |
| EPHA3       | EPH receptor A3                                                                       | 0,534477104 | 5,77E-08 |
| GSN         | gelsolin (amyloidosis, Finnish type)                                                  | 0,533163023 | 6,30E-08 |
| HMCN1       | hemicentin 1                                                                          | 0,532545377 | 6,57E-08 |
| GUCY1A3     | guanylate cyclase 1, soluble, alpha 3                                                 | 0,532180971 | 6,73E-08 |
| MST150      | MSTP150                                                                               | 0,532136101 | 6,75E-08 |
| ITM2A       | integral membrane protein 2A                                                          | 0,531970097 | 6,83E-08 |
| CCPG1       | cell cycle progression 1                                                              | 0,531759089 | 6,92E-08 |
| ILK         | integrin-linked kinase                                                                | 0,531706704 | 6,95E-08 |
| RASA3       | RAS p21 protein activator 3                                                           | 0,530911475 | 7,33E-08 |
| C2orf40     | chromosome 2 open reading frame 40                                                    | 0,530643261 | 7,46E-08 |
| COMP        | cartilage oligomeric matrix protein                                                   | 0,530286972 | 7,64E-08 |
| IL33        | interleukin 33                                                                        | 0,530146407 | 7,71E-08 |
| hCG_1806964 | hypothetical LOC401093                                                                | 0,530065103 | 7,75E-08 |
| CYTL1       | cytokine-like 1                                                                       | 0,52971609  | 7,93E-08 |
| MEIS1       | Meis homeobox 1                                                                       | 0,529687612 | 7,95E-08 |
| PTGS1       | prostaglandin-endoperoxide synthase 1 (prostaglandin G/H synthase and cyclooxygenase) | 0,529685323 | 7,95E-08 |
| CYYR1       | cysteine/tyrosine-rich 1                                                              | 0,52898429  | 8,33E-08 |
| CYBRD1      | cytochrome b reductase 1                                                              | 0,52893539  | 8,36E-08 |
| PLA2G5      | phospholipase A2, group V                                                             | 0,528837626 | 8,41E-08 |
| C1QTNF1     | C1q and tumor necrosis factor related protein 1                                       | 0,528689382 | 8,49E-08 |
| P2RX1       | purinergic receptor P2X, ligand-gated ion channel, 1                                  | 0,528175519 | 8,79E-08 |
| C15orf5     | chromosome 15 open reading frame 5                                                    | 0,528140796 | 8,81E-08 |
| SOBP        | sine oculis binding protein homolog (Drosophila)                                      | 0,527684849 | 9,08E-08 |
| PAM         | peptidylglycine alpha-amidating monooxygenase                                         | 0,527215358 | 9,37E-08 |
| LAMB2       | laminin, beta 2 (laminin S)                                                           | 0,527124827 | 9,42E-08 |
| RBPMS2      | RNA binding protein with multiple splicing 2                                          | 0,526735798 | 9,67E-08 |
| FLRT2       | fibronectin leucine rich transmembrane protein 2                                      | 0,526125204 | 1,01E-07 |
| COL21A1     | collagen, type XXI, alpha 1                                                           | 0,526120876 | 1,01E-07 |
| PDGFRL      | platelet-derived growth factor receptor-like                                          | 0,525328773 | 1,06E-07 |
| HSPA12B     | heat shock 70kD protein 12B                                                           | 0,524083598 | 1,15E-07 |
| MMRN1       | multimerin 1                                                                          | 0,523745448 | 1,18E-07 |
| SPON2       | spondin 2, extracellular matrix protein                                               | 0,523533954 | 1,19E-07 |
| GPC6        | glypican 6                                                                            | 0,522093544 | 1,31E-07 |
| PRDM6       | PR domain containing 6                                                                | 0,522071054 | 1,31E-07 |
| FXYD6       | FXYD domain containing ion transport regulator 6                                      | 0,521560915 | 1,36E-07 |
| COL13A1     | collagen, type XIII, alpha 1                                                          | 0,521159737 | 1,39E-07 |
| RUNX1T1     | runt-related transcription factor 1, translocated to, 1 (cyclin D-related)            | 0,520846285 | 1,42E-07 |
| MAP1A       | microtubule-associated protein 1A                                                     | 0,5204148   | 1,46E-07 |
| FAM38B      | family with sequence similarity 38, member B                                          | 0,520125452 | 1,49E-07 |
| MAP1B       | microtubule-associated protein 1B                                                     | 0,519793017 | 1,52E-07 |
| KLHL5       | kelch-like 5 (Drosophila)                                                             | 0,518928745 | 1,61E-07 |
| FGL2        | fibrinogen-like 2                                                                     | 0,518590456 | 1,64E-07 |
| CCL14       | chemokine (C-C motif) ligand 14                                                       | 0,518570734 | 1,64E-07 |
| CLDN5       | claudin 5                                                                             | 0,517711127 | 1,74E-07 |
| HSD11B1     | hydroxysteroid (11-beta) dehydrogenase 1                                              | 0,517657965 | 1,74E-07 |
| BDKRB2      | bradykinin receptor B2                                                                | 0,517630922 | 1,75E-07 |
| ALDH1B1     | aldehyde dehydrogenase 1 family, member B1                                            | 0,517625629 | 1,75E-07 |
| KLF9        | Kruppel-like factor 9                                                                 | 0,517624245 | 1,75E-07 |
| HSPB2       | heat shock 27kDa protein 2                                                            | 0,516638884 | 1,86E-07 |
| SCRG1       | stimulator of chondrogenesis 1                                                        | 0,516413187 | 1,89E-07 |
| OMD         | osteomodulin                                                                          | 0,515893431 | 1,95E-07 |
| CFL2        | cofilin 2 (muscle)                                                                    | 0,515645403 | 1,98E-07 |
| ITGA7       | integrin, alpha 7                                                                     | 0,515169828 | 2,04E-07 |
| SIDT2       | SID1 transmembrane family, member 2                                                   | 0,514918722 | 2,08E-07 |
| LRRC70      | leucine rich repeat containing 70                                                     | 0,514726982 | 2,10E-07 |
| TRAM2       | translocation associated membrane protein 2                                           | 0,514254775 | 2,17E-07 |
| C7          | complement component 7                                                                | 0,513881388 | 2,22E-07 |

|            |                                                                                        |              |          |
|------------|----------------------------------------------------------------------------------------|--------------|----------|
| CLIP3      | CAP-GLY domain containing linker protein 3                                             | 0,513399374  | 2,29E-07 |
| CSGALNACT2 | chondroitin sulfate N-acetylgalactosaminyltransferase 2                                | 0,512996364  | 2,34E-07 |
| POPDC2     | popeye domain containing 2                                                             | 0,51272841   | 2,38E-07 |
| COL12A1    | collagen, type XII, alpha 1                                                            | 0,512580046  | 2,41E-07 |
| CHSY3      | chondroitin sulfate synthase 3                                                         | 0,512407764  | 2,43E-07 |
| SEMA3G     | sema domain, immunoglobulin domain (Ig), short basic domain, secreted, (semaphorin) 3G | 0,511994015  | 2,50E-07 |
| GIMAP8     | GTPase, IMAP family member 8                                                           | 0,511856907  | 2,52E-07 |
| SLIT3      | slit homolog 3 (Drosophila)                                                            | 0,511627563  | 2,56E-07 |
| P2RY14     | purinergic receptor P2Y, G-protein coupled, 14                                         | 0,511490725  | 2,58E-07 |
| CCDC102B   | coiled-coil domain containing 102B                                                     | 0,51001874   | 2,83E-07 |
| ADAMTS5    | ADAM metalloproteinase with thrombospondin type 1 motif, 5                             | 0,509953961  | 2,84E-07 |
| CHN1       | chimerin (chimaerin) 1                                                                 | 0,509773963  | 2,87E-07 |
| ESAM       | endothelial cell adhesion molecule                                                     | 0,509302766  | 2,96E-07 |
| PAMR1      | peptidase domain containing associated with muscle regeneration 1                      | 0,508981832  | 3,01E-07 |
| LIMS2      | LIM and senescent cell antigen-like domains 2                                          | 0,508558389  | 3,10E-07 |
| SORBS3     | sorbin and SH3 domain containing 3                                                     | 0,508345452  | 3,14E-07 |
| GFPT2      | glutamine-fructose-6-phosphate transaminase 2                                          | 0,508112381  | 3,18E-07 |
| PLVAP      | plasmalemma vesicle associated protein                                                 | 0,507827654  | 3,24E-07 |
| UACA       | uveal autoantigen with coiled-coil domains and ankyrin repeats                         | 0,507646312  | 3,28E-07 |
| ADAMTS8    | ADAM metalloproteinase with thrombospondin type 1 motif, 8                             | 0,507128295  | 3,38E-07 |
| FRZB       | frizzled-related protein                                                               | 0,506782521  | 3,46E-07 |
| SPRY1      | sprouty homolog 1, antagonist of FGF signaling (Drosophila)                            | 0,506346355  | 3,55E-07 |
| ARHGAP1    | Rho GTPase activating protein 1                                                        | 0,505526681  | 3,73E-07 |
| MAOB       | monoamine oxidase B                                                                    | 0,505526349  | 3,73E-07 |
| ADAM12     | ADAM metalloproteinase domain 12                                                       | 0,504914852  | 3,88E-07 |
| VWF        | von Willebrand factor                                                                  | 0,504220178  | 4,05E-07 |
| PTGIS      | prostaglandin I2 (prostacyclin) synthase                                               | 0,504130967  | 4,07E-07 |
| CHST15     | carbohydrate (N-acetylgalactosamine 4-sulfate 6-O) sulfotransferase 15                 | 0,503948825  | 4,11E-07 |
| MYCT1      | myc target 1                                                                           | 0,503574916  | 4,21E-07 |
| LAYN       | layilin                                                                                | 0,503020949  | 4,35E-07 |
| KCTD10     | potassium channel tetramerisation domain containing 10                                 | 0,502514749  | 4,49E-07 |
| LPPR4      | plasticity related gene 1                                                              | 0,501818702  | 4,69E-07 |
| KIAA1644   | KIAA1644                                                                               | 0,501381163  | 4,81E-07 |
| FAM129A    | family with sequence similarity 129, member A                                          | 0,501236788  | 4,85E-07 |
| EGR1       | early growth response 1                                                                | 0,500549969  | 5,06E-07 |
| PDE1A      | phosphodiesterase 1A, calmodulin-dependent                                             | 0,500427762  | 5,10E-07 |
| PAPPA      | pregnancy-associated plasma protein A, pappalysin 1                                    | 0,500406979  | 5,11E-07 |
| ABCA9      | ATP-binding cassette, sub-family A (ABC1), member 9                                    | 0,500191915  | 5,17E-07 |
| C1orf226   | chromosome 1 open reading frame 226                                                    | -0,502854036 | 4,40E-07 |
| ZSWIM3     | zinc finger, SWIM-type containing 3                                                    | -0,510648578 | 2,72E-07 |
| DCAF7      | DDB1 and CUL4 associated factor 7                                                      | -0,518652155 | 1,64E-07 |
| C21orf49   | chromosome 21 open reading frame 49                                                    | -0,523834329 | 1,17E-07 |
| DARS2      | aspartyl-tRNA synthetase 2, mitochondrial                                              | -0,5249644   | 1,09E-07 |
| MARVELD2   | MARVEL domain containing 2                                                             | -0,525110079 | 1,08E-07 |
| MCM3APAS   | MCM3AP antisense RNA (non-protein coding)                                              | -0,527444169 | 9,22E-08 |
| DUSP12     | dual specificity phosphatase 12                                                        | -0,532874915 | 6,42E-08 |
| OVOL2      | ovo-like 2 (Drosophila)                                                                | -0,537186858 | 4,80E-08 |
| ZNF672     | zinc finger protein 672                                                                | -0,537374006 | 4,74E-08 |
| MTMR4      | myotubularin related protein 4                                                         | -0,554562318 | 1,42E-08 |
| APITD1     | apoptosis-inducing, TAF9-like domain 1                                                 | -0,558105609 | 1,10E-08 |
| FKBP4      | FK506 binding protein 4, 59kDa                                                         | -0,558742831 | 1,05E-08 |
| C1orf172   | chromosome 1 open reading frame 172                                                    | -0,569760796 | 4,60E-09 |
| C1orf96    | chromosome 1 open reading frame 96                                                     | -0,570734397 | 4,28E-09 |

**Supplementary Table 2: Functional pathways and gene ontology annotations relative to biological processes significantly enriched in genes positively correlated with *DCN* in human MIBC.**

Genes positively correlated with *DCN* listed in supplementary table 1 were analyzed using DAVID functional annotation tool. Corrected p-value used were  $p < 1.10^{-2}$  and  $p < 1.10^{-3}$  for functional pathways and for gene ontology annotations, respectively.

# Supplementary Table 2

Supplementary Table2: Functional pathways and gene ontology annotations relative to biological process significantly (corrected p-value  $p < 10^{-2}$  and  $p < 10^{-3}$  respectively) enriched in genes positively correlated to DCN in human MIBC (supplementary Table1) identified using DAVID functional annotation tool.

| Input / Pathway genes | Pathway                                | Corrected p-value | Input Genes                                                                                                                                                                                                                                                                                                                                                                                                                                                                                                                                                                                                                                         |
|-----------------------|----------------------------------------|-------------------|-----------------------------------------------------------------------------------------------------------------------------------------------------------------------------------------------------------------------------------------------------------------------------------------------------------------------------------------------------------------------------------------------------------------------------------------------------------------------------------------------------------------------------------------------------------------------------------------------------------------------------------------------------|
| 25/80                 | ECM-receptor interaction               | 1.85E-10          | COL1A1, COL1A2, COL3A1, COL4A1, COL4A2, COL5A1, COL5A2, COL6A1, COL6A2, COL6A3, COMP, FN1, HSPG2, ITGA11, ITGA5, ITGA7, LAMA2, LAMA4, LAMB2, LAMC1, SDC2, THBS1, THBS2, TNC, VWF                                                                                                                                                                                                                                                                                                                                                                                                                                                                    |
| 38/194                | Focal adhesion                         | 4.31E-10          | ACTN1, CAV1, CCND2, COL1A1, COL1A2, COL3A1, COL4A1, COL4A2, COL5A1, COL5A2, COL6A1, COL6A2, COL6A3, COMP, FLNA, FLNC, FN1, IGF1, ILK, ITGA11, ITGA5, ITGA7, KDR, LAMA2, LAMA4, LAMB2, LAMC1, MYL9, MYLK, PARVA, PDGFC, PDGFRA, PDGFRB, THBS1, THBS2, VCL, VWF                                                                                                                                                                                                                                                                                                                                                                                       |
| 14/109                | Leukocyte transendothelial migration   | 4.93E-05          | ACTN1, CDH5, CLDN5, CXCL12, ESAM, JAM2, JAM3, MMP2, MSN, MYL9, PECAM1, THY1, VCAM1, VCL                                                                                                                                                                                                                                                                                                                                                                                                                                                                                                                                                             |
| 17/204                | Regulation of actin cytoskeleton       | 0.0013918         | ACTN1, BDKRB2, CFL2, FGF7, FGF19, FN1, GSN, ITGA11, ITGA5, ITGA7, MSN, MYL9, MYLK, PDGFC, PDGFRA, PDGFRB, VCL                                                                                                                                                                                                                                                                                                                                                                                                                                                                                                                                       |
| 12/125                | Cell adhesion molecules (CAMs)         | 0.0057623         | CD34, CDH5, CLDN5, ESAM, JAM2, JAM3, NEGR1, PECAM1, SDC2, SELP, VCAM1, VCAN                                                                                                                                                                                                                                                                                                                                                                                                                                                                                                                                                                         |
| GO id                 | GO Term                                | Corrected P-value | Genes                                                                                                                                                                                                                                                                                                                                                                                                                                                                                                                                                                                                                                               |
| GO:0007155            | cell adhesion                          | 1.17E-34          | DLC1, AEBP1, COL21A1, IGFBP7, FERMT2, CLDN5, POSTN, MMRN1, CXCL12, DDR2, VCL, SRPX, S1PR1, CD93, CTGF, ILK, COL12A1, ESAM, MSN, SPON2, NEGR1, BOC, CYR61, SPON1, PDPN, MGP, ACTN1, CPXM2, MFGE8, THY1, CD34, CPXM1, VCAN, LAMC1, TGFB11, JAM2, ADAM12, MFAP4, AOC3, PARVA, EMCN, TNC, COL3A1, ITGA11, DCHS1, CDH5, ITGBL1, VCAM1, ISLR, SORBS3, LAMB2, SORBS1, COMP, COL6A3, COL6A2, COL6A1, ENTPD1, THBS1, THBS2, COL8A2, FN1, DPT, COL18A1, FLRT2, SELP, COL13A1, COL15A1, HSPG2, NID1, NID2, ECM2, MCAM, COL16A1, COL5A1, PCDH18, EMILIN1, CCL11, LAMA2, VWF, LYVE1, LAMA4, OMD, COL14A1, SNED1, ITGA5, FBLN5, ITGA7, PECAM1, ANTXR1, NTM, CDH11 |
| GO:0022610            | biological adhesion                    | 1.32E-34          | DLC1, AEBP1, COL21A1, IGFBP7, FERMT2, CLDN5, POSTN, MMRN1, CXCL12, DDR2, VCL, SRPX, S1PR1, CD93, CTGF, ILK, COL12A1, ESAM, MSN, SPON2, NEGR1, BOC, CYR61, SPON1, PDPN, MGP, ACTN1, CPXM2, MFGE8, THY1, CD34, CPXM1, VCAN, LAMC1, TGFB11, JAM2, ADAM12, MFAP4, AOC3, PARVA, EMCN, TNC, COL3A1, ITGA11, DCHS1, CDH5, ITGBL1, VCAM1, ISLR, SORBS3, LAMB2, SORBS1, COMP, COL6A3, COL6A2, COL6A1, ENTPD1, THBS1, THBS2, COL8A2, FN1, DPT, COL18A1, FLRT2, SELP, COL13A1, COL15A1, HSPG2, NID1, NID2, ECM2, MCAM, COL16A1, COL5A1, PCDH18, EMILIN1, CCL11, LAMA2, VWF, LYVE1, LAMA4, OMD, COL14A1, SNED1, ITGA5, FBLN5, ITGA7, PECAM1, ANTXR1, NTM, CDH11 |
| GO:0030198            | extracellular matrix organization      | 5.72E-20          | LUM, ELN, COL3A1, POSTN, DCN, CRISPLD2, FOXF1, ILK, COL6A2, COL12A1, COL8A2, DPT, CYR61, COL18A1, RECK, COL4A2, CCDC80, HSPG2, NID1, ECM2, COL5A2, COL5A1, EMILIN1, CSGALNACT1, COL14A1, FBLN5, COL1A2, PDGFRA, MYH11, COL1A1, LAMC1                                                                                                                                                                                                                                                                                                                                                                                                                |
| GO:0043062            | extracellular structure organization   | 6.41E-16          | TNC, LUM, COL3A1, ELN, POSTN, DCN, CRISPLD2, FOXF1, ILK, COL6A2, COL12A1, COL8A2, DPT, CYR61, RECK, COL18A1, COL4A2, MAP1B, CCDC80, HSPG2, NID1, ECM2, COL5A2, COL5A1, EMILIN1, CSGALNACT1, COL14A1, FBLN5, COL1A2, PDGFRA, MYH11, COL1A1, LAMC1                                                                                                                                                                                                                                                                                                                                                                                                    |
| GO:0001944            | vasculature development                | 2.19E-13          | EMCN, CAV1, ACVRL1, COL3A1, PRRX1, GJA4, MMP2, CXCL12, CDH5, EDNRA, TCF21, S1PR1, CTGF, FOXF1, ROBO4, SOX17, PLXND1, THBS1, CYR61, RECK, COL18A1, SELP, PDPN, TGFB2, COL15A1, ARHGAP24, COL5A1, SLIT2, THY1, KDR, LAMA4, BGN, PLXDC1, ITGA7, COL1A2, ZFPM2, COL1A1                                                                                                                                                                                                                                                                                                                                                                                  |
| GO:0001568            | blood vessel development               | 3.50E-12          | EMCN, CAV1, ACVRL1, COL3A1, PRRX1, GJA4, MMP2, CXCL12, CDH5, EDNRA, S1PR1, CTGF, FOXF1, ROBO4, SOX17, PLXND1, THBS1, CYR61, RECK, COL18A1, SELP, TGFB2, COL15A1, ARHGAP24, COL5A1, SLIT2, THY1, KDR, LAMA4, BGN, PLXDC1, ITGA7, COL1A2, ZFPM2, COL1A1                                                                                                                                                                                                                                                                                                                                                                                               |
| GO:0031589            | cell-substrate adhesion                | 1.73E-10          | DLC1, COL13A1, COL3A1, ITGA11, ACTN1, NID1, NID2, ECM2, ITGBL1, THY1, VWF, LYVE1, SORBS3, SNED1, SORBS1, CTGF, FBLN5, ILK, ITGA7, ANTXR1, LAMC1, FN1                                                                                                                                                                                                                                                                                                                                                                                                                                                                                                |
| GO:0009611            | response to wounding                   | 1.09E-07          | TPST1, C7, A2M, FGF7, ACVRL1, F13A1, TNC, COL3A1, TGFB3, C1R, C1S, BDKRB2, MMRN1, TIMP3, TPM1, HMCN1, LAMB2, CTGF, GSN, THBS1, ENTPD1, PAPS2, FN1, SELP, PTGER3, PDPN, EFEMP2, MAP1B, TGFB2, IGF1, COL5A1, EPHA3, CCL11, VWF, LYVE1, P2RX1, PLSCR4, DARIC, ITGA5, FBLN5, AOX1, PDGFRA, VCAN, AOC3                                                                                                                                                                                                                                                                                                                                                   |
| GO:0007160            | cell-matrix adhesion                   | 2.89E-07          | DLC1, COL13A1, COL3A1, ITGA11, ACTN1, NID1, NID2, ECM2, ITGBL1, THY1, LYVE1, SNED1, SORBS1, CTGF, FBLN5, ILK, ITGA7, FN1                                                                                                                                                                                                                                                                                                                                                                                                                                                                                                                            |
| GO:0035295            | tube development                       | 3.30E-07          | DLC1, FGF7, TGFB3, ZEB2, GREM1, CXCL12, EDNRA, TCF21, SPRY1, OVOL2, CRISPLD2, GATA6, CTGF, FOXF1, ILK, PLXND1, CYR61, PDPN, TGFB2, IGF1, MGP, SHANK3, SLIT2, KDR, HSD11B1, PDGFRA, ZFPM2                                                                                                                                                                                                                                                                                                                                                                                                                                                            |
| GO:0048514            | blood vessel morphogenesis             | 7.11E-07          | CAV1, EMCN, ACVRL1, PRRX1, CXCL12, EDNRA, S1PR1, CTGF, FOXF1, ROBO4, SOX17, PLXND1, THBS1, CYR61, COL18A1, SELP, TGFB2, COL15A1, ARHGAP24, SLIT2, THY1, KDR, BGN, PLXDC1, ITGA7, ZFPM2                                                                                                                                                                                                                                                                                                                                                                                                                                                              |
| GO:0030334            | regulation of cell migration           | 1.38E-06          | DLC1, COL18A1, SELP, ACVRL1, PDPN, IGF1, GREM1, NEXN, CXCL12, TPM1, THY1, VCL, KDR, LAMA2, LAMA4, S1PR1, SERPINE2, ILK, PDGFRA, ROBO4, PDGFRB, TIE1, THBS1                                                                                                                                                                                                                                                                                                                                                                                                                                                                                          |
| GO:0040012            | regulation of locomotion               | 2.95E-06          | DLC1, COL18A1, SELP, ACVRL1, PDPN, IGF1, GREM1, NEXN, CXCL12, TPM1, SLIT2, THY1, VCL, KDR, LAMA2, LAMA4, S1PR1, SERPINE2, ILK, PDGFRA, ROBO4, PDGFRB, TIE1, THBS1                                                                                                                                                                                                                                                                                                                                                                                                                                                                                   |
| GO:0051270            | regulation of cell motion              | 3.27E-06          | DLC1, COL18A1, SELP, ACVRL1, PDPN, ACTN1, IGF1, GREM1, NEXN, CXCL12, TPM1, THY1, VCL, KDR, LAMA2, LAMA4, S1PR1, SERPINE2, ILK, PDGFRA, ROBO4, PDGFRB, TIE1, THBS1                                                                                                                                                                                                                                                                                                                                                                                                                                                                                   |
| GO:0042060            | wound healing                          | 1.41E-05          | FGF7, ACVRL1, F13A1, EFEMP2, TGFB2, COL3A1, TGFB3, IGF1, MMRN1, TIMP3, TPM1, COL5A1, VWF, HMCN1, PLSCR4, P2RX1, ITGA5, GSN, FBLN5, PDGFRA, ENTPD1, PAPS2, FN1                                                                                                                                                                                                                                                                                                                                                                                                                                                                                       |
| GO:0007517            | muscle organ development               | 8.81E-05          | MEF2C, CAV1, AEBP1, ACTC1, CRYAB, FHL1, TNC, ELN, ITGA11, HSPG2, IGF1, TPM1, LAMA2, SMTN, TAGLN, GATA6, PLN, ITGA7, COL6A3, MYH11, SGCD, PDGFRB, ZFPM2                                                                                                                                                                                                                                                                                                                                                                                                                                                                                              |
| GO:0001525            | angiogenesis                           | 1.46E-04          | FGFR1, CALCL, THY1, KDR, TIE1, CTGF, ACVRL1, ITGA5, SOX17, MEIS1, COL8A2, HSPG2, CD34, PLXDC1, COL4A2, COL4A1, MMP2, ROBO4, COL18A1, ARHGAP24, MCAM, PLXND1, PARVA, JAM3, S1PR1, GPR124, FN1, MFGE8, THBS1, CYR61, COL15A1                                                                                                                                                                                                                                                                                                                                                                                                                          |
| GO:0042127            | regulation of cell proliferation       | 2.75E-04          | DLC1, FGF1, CAV1, FGF7, ACVRL1, NDN, IGFBP7, MITF, PTGS1, PRRX1, TGFB3, BDKRB2, ZEB1, TIMP2, TENC1, DDR2, CDH5, TIMP1, VCAM1, EDNRA, EDNRB, S1PR1, OVOL2, ILK, ADRA2A, PDGFC, CALCL, THBS1, DPT, COL18A1, TGFB2, IGF1, MFGE8, GAS1, SPARC, CLEC11A, KDR, ADAMTS8, CCL14, CCND2, PDGFRA, PDGFRB, WDC1, ADAMTS1, TGFB11, LAMC1, EMP3, PMP22                                                                                                                                                                                                                                                                                                           |
| GO:0030036            | actin cytoskeleton organization        | 3.00E-04          | RHOJ, DLC1, ACTC1, CALD1, ELN, FERMT2, PDLIM3, ARHGEF17, ACTN1, DAAM2, TPM1, GAS7, FLNA, EPB41L2, SORBS1, GSN, ADRA2A, MYH11, ANTXR1, CNN1, WIPF1, EHD2, PARVA                                                                                                                                                                                                                                                                                                                                                                                                                                                                                      |
| GO:0035239            | tube morphogenesis                     | 4.79E-04          | DLC1, PDPN, TGFB2, IGF1, MGP, ZEB2, GREM1, CXCL12, SHANK3, KDR, EDNRA, TCF21, OVOL2, FOXF1, ILK, PLXND1, CYR61                                                                                                                                                                                                                                                                                                                                                                                                                                                                                                                                      |
| GO:0006928            | cell motion                            | 8.61E-04          | CTHRC1, ACVRL1, NDN, CALD1, VIM, ITGA11, ZEB2, CXCL12, TPM1, VCL, VCAM1, EDNRB, OVOL2, CTGF, ADRA2A, MSN, SPON2, THBS1, FN1, SELP, EGR2, IGF1, GAS1, COL5A1, SLIT2, KDR, SLIT3, LYVE1, TNS1, CD34, ITGA5, PDGFRB, VCAN, LAMC1                                                                                                                                                                                                                                                                                                                                                                                                                       |
| GO:0030029            | actin filament-based process           | 9.18E-04          | RHOJ, DLC1, ACTC1, CALD1, ELN, FERMT2, PDLIM3, ARHGEF17, ACTN1, DAAM2, TPM1, GAS7, FLNA, EPB41L2, SORBS1, GSN, ADRA2A, MYH11, ANTXR1, CNN1, WIPF1, EHD2, PARVA                                                                                                                                                                                                                                                                                                                                                                                                                                                                                      |
| GO:0001763            | morphogenesis of a branching structure | 9.98E-04          | COL13A1, TGFB2, IGF1, MGP, GREM1, CXCL12, KDR, EDNRA, TCF21, FOXF1, ILK, PLXND1, CYR61                                                                                                                                                                                                                                                                                                                                                                                                                                                                                                                                                              |
| GO:0030199            | collagen fibril organization           | 0.001             | COL14A1, LUM, COL3A1, COL1A2, COL12A1, COL1A1, COL5A2, COL5A1, DPT                                                                                                                                                                                                                                                                                                                                                                                                                                                                                                                                                                                  |

**Supplementary Table 3:** Affymetrix U133plus2.0 microarray data in 162 human bladder tumors and 4 normal samples, for genes correlated with *DCN* in MIBC (pearson  $R > 0.5$ ).

Affymetrix U133plus2.0 microarray data were normalized using the RMA method together with BrainArray custom chip description files (CDF) for genes correlated with *DCN* in MIBC (pearson  $R > 0.5$ ). Data obtained in 162 bladder tumors and 4 normal samples.

see accompanying excel file.
